# Supplementary material for: Cleavage Factor I Links Transcription Termination to DNA Damage Response and Genome Integrity Maintenance in Saccharomyces cerevisiae
Source: PubMed Central journal article supplement (PMC3945788; doi:10.1371/journal.pgen.1004203), 2014-03-06
Supplement: pgen.1004203.s010.pdf [file pgen.1004203.s010.pdf]

**Table S2. Gene Ontology results for the genes with altered expression levels in *rna14-1* and *rna15-1* mutants.**

|                             | <b>GO term (GO ID) of up-regulated genes</b>                                                                                                                         | <b><i>rna14-1</i><br/>P-value</b> | <b><i>rna15-1</i><br/>P-value</b>            |
|-----------------------------|----------------------------------------------------------------------------------------------------------------------------------------------------------------------|-----------------------------------|----------------------------------------------|
| <b>catabolic processes</b>  | catabolic process (9056)<br>cofactor catabolic process (51187)<br>carboxylic acid catabolic process (46395)<br>mitochondrion degradation (422)                       | 3.07e-06<br>0.00394<br>0.00753    | 0.00599                                      |
| <b>response to stimulus</b> | response to stimulus (50896)<br>response to stress (6950)<br>response to chemical stimulus (42221)<br>response to organic substance (10033)                          | 1.04e-05<br>0.00137<br>0.00830    | 0.00338<br>5.07e-06<br>0.00325               |
| <b>reproductive process</b> | sexual reproduction (19953)<br>sporulation (43934)<br>reproductive process (22414/22413)<br>conjugation with cellular fusion (747)<br>response to pheromone (19236)  | 0.00329<br>0.00066<br>0.00690     | 4.79e-08<br>1.25e-07<br>1.63e-06<br>3.96e-05 |
| <b>Cell development</b>     | cell differentiation (30154)<br>anatomical structure formation involved in morphogenesis (48646)<br>anatomical structure development (48856)                         | 0.00389<br>0.00066<br>0.00231     |                                              |
| <b>others</b>               | energy derivation by oxidation of organic compounds (15980)<br>tricarboxylic acid cycle (6099)<br>glucose metabolic process (6006)<br>multi-organism process (51704) | 0.00312<br>0.00519                | 0.00764<br>4.19e-06                          |

|                               | <b>GO term (GO ID) of down-regulated genes</b>                                                                                                                                                                                                                                                                                                             | <b><i>rna14-1</i><br/>P-value</b>                                              | <b><i>rna15-1</i><br/>P-value</b>                                                                                        |
|-------------------------------|------------------------------------------------------------------------------------------------------------------------------------------------------------------------------------------------------------------------------------------------------------------------------------------------------------------------------------------------------------|--------------------------------------------------------------------------------|--------------------------------------------------------------------------------------------------------------------------|
| <b>localization</b>           | establishment of localization (51234)<br>localization (51179)                                                                                                                                                                                                                                                                                              | 0.00825<br>0.00182                                                             | 7.61e-08<br>1.40e-08                                                                                                     |
| <b>glycoprotein processes</b> | glycoprotein biosynthetic process (9101)<br>macromolecule glycosylation (43413)<br>protein amino acid glycosylation (6486)<br>glycosylation (70085)<br>glycoprotein metabolic process (9100)<br>protein amino acid O-linked glycosylation (6493)<br>protein amino acid N-linked glycosylation (6487)                                                       | 1.26e-07<br>1.84e-07<br>1.84e-07<br>1.84e-07<br>2.31e-07<br>0.00132<br>0.00785 | 0.00224<br>0.00093<br>0.00093<br>0.00093<br>0.00312                                                                      |
| <b>lipoprotein processes</b>  | lipoprotein metabolic process (42157)<br>lipoprotein biosynthetic process (42158)<br>protein amino acid lipidation (6497)                                                                                                                                                                                                                                  | 0.00027<br>0.00027<br>0.00027                                                  |                                                                                                                          |
| <b>transport</b>              | transport (6810)<br>transition metal ion transport (41)<br>metal ion transport (30001)<br>copper ion import (15677)<br>copper ion transmembrane transport (35434)<br>cation transport (6812)<br>copper ion transport (6825)<br>ion transport (6811)<br>ion transmembrane transport (34220)<br>transmembrane transport (55085)<br>iron ion transport (6826) |                                                                                | 1.13e-07<br>2.60e-06<br>6.79e-06<br>0.00013<br>0.00037<br>0.00082<br>0.00100<br>0.00543<br>0.00590<br>0.00841<br>0.00999 |
| <b>others</b>                 | cellular process (9987)<br>cellular carbohydrate metabolic process (44262)<br>carbohydrate metabolic process (5975)                                                                                                                                                                                                                                        | 0.00073<br>0.00088<br>0.00237                                                  |                                                                                                                          |
