# Supplementary material for: Cleavage Factor I Links Transcription Termination to DNA Damage Response and Genome Integrity Maintenance in Saccharomyces cerevisiae
Source: PubMed Central journal article supplement (PMC3945788; doi:10.1371/journal.pgen.1004203), 2014-03-06
Supplement: pgen.1004203.s012.pdf [file pgen.1004203.s012.pdf]

**Table S4. Primers used in this study**

| <b>Name</b>          | <b>Sequence</b>                  |
|----------------------|----------------------------------|
| RPB2-A               | 5'-TCTTGGGAATAATAACTTCGCGGC-3'   |
| RPB2-B               | 5'-GGTGGATGACAAGATACATGCC-3'     |
| ARS508 1-A           | 5'-CCCGTGGTAAACCTTTAGAAAAAC-3'   |
| ARS508 1-B           | 5'-ATATGAACGGCAAATTGAGACAAA-3'   |
| ARS508 2-A           | 5'-AGTCATTAATAGCAAAGCCGTACGT-3'  |
| ARS508 2-B           | 5'-GGTCCTTTGATGTAACGATCATATTG-3' |
| ARS305 1-A           | 5'-TTCTTCCTCAGGTTTGCCTAGTG-3'    |
| ARS305 1-B           | 5'-TGCCAAGTCTGATCGAAAAGC-3'      |
| ARS305 2-A           | 5'-TGCTCTTAGTGCAAAACACGAAA-3'    |
| ARS305 2-B           | 5'-TCCTCCGTGGTCGATTGTG-3'        |
| ARS416 1-A           | 5'-CAGGCGCATACGCTACAATG-3'       |
| ARS416 1-B           | 5'-GGTTGTTTGCAAGACCGAGAA-3'      |
| ARS416 2-A           | 5'-TGTTGTTGTGCTGCTTGTTCCTT-3'    |
| ARS416 2-B           | 5'-ATCCGCGCCGCAATT-3'            |
| 242210-242280 ChrV A | 5'-TGCCTGCACGCCATTGT-3'          |
| 242210-242280 ChrV B | 5'-TTCCCCACGGAAAGTTGTATCT-3'     |
